# Supplementary material for: Immediate cardiopulmonary responses to consecutive pulmonary embolism: a randomized, controlled, experimental study
Source: Springer Nature journal article supplement (doi:10.1186/s12890-024-03006-9), 2024-05-14
Supplement: MOESM1 [file 27090866]

1 Supplementary figure 1:

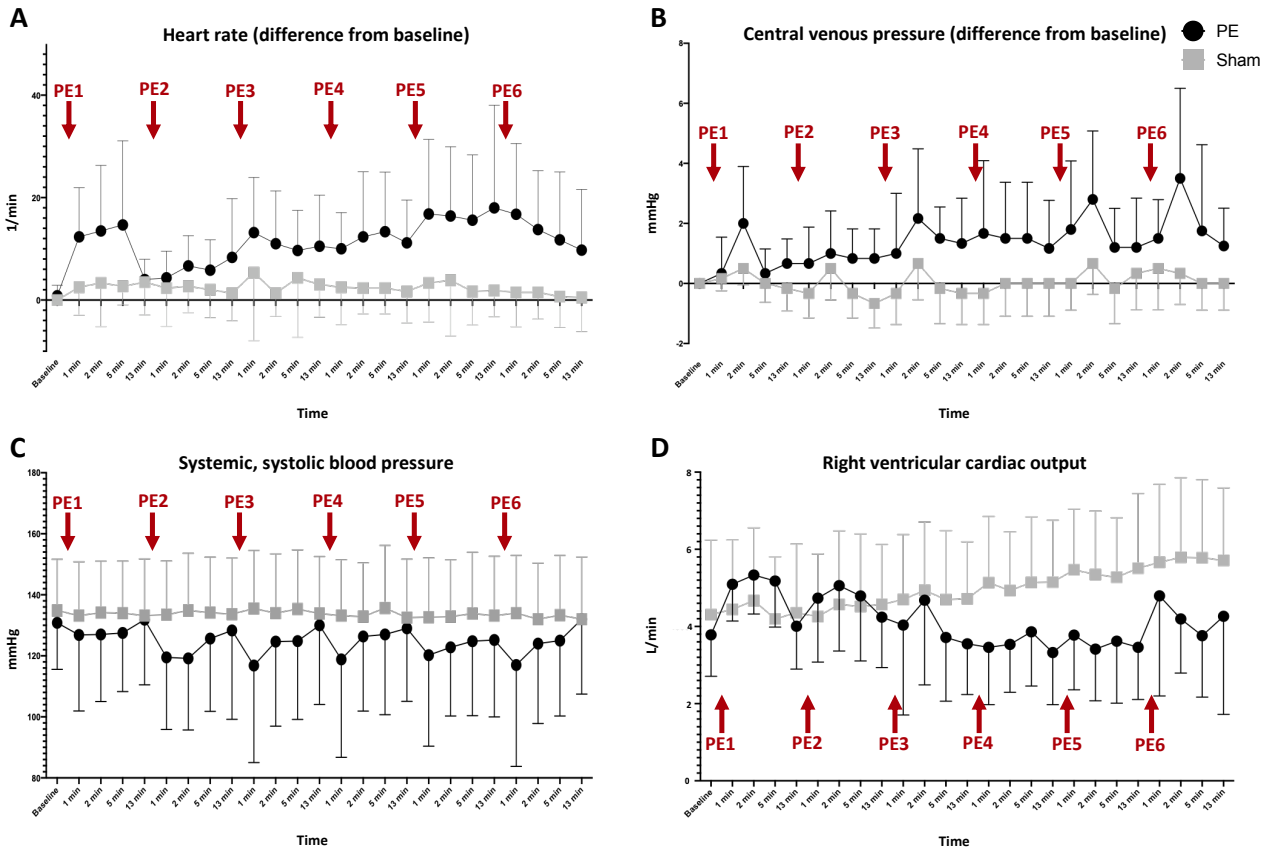

2

3 Title: Systemic variables in consecutive pulmonary embolism

4 Caption: Consecutive, acute pulmonary embolisms increased heart rate (A), mostly at the first  
5 embolism, and central venous pressure (B). Systolic, systemic blood pressure dropped transiently at  
6 every embolism induced (C). The cardiac output (D) was initially compensated by increased heart  
7 rate and stroke volume, but low output remained following the third pulmonary embolism. Please  
8 compare the latter to Figure 2C on right ventricular stroke volume.

9
